# Supplementary material for: Cross Species Analysis and Comparison of Tumors in Dogs and Cats, by Age, Sex, Topography and Main Morphologies. Data from Vet-OncoNet
Source: MDPI journal article supplement (doi:10.3390/vetsci9040167), 2022-03-31
Supplement: s1 [file s1]

## Supplementary materials

# Cross species analysis of tumors in dogs and cats, by age, sex, topography and main morphologies. Data from Vet-OncoNet.

**Katia Pinello<sup>1,2,3\*</sup>, Isabel Pires<sup>4,5</sup>, Ana Filipa Castro<sup>1</sup>, Paulo Tiago Carvalho<sup>1</sup>, Andreia Santos<sup>6,7</sup>, Augusto de Matos<sup>6,7</sup>, Felisbina Queiroga<sup>4,5,7</sup>, Irina Amorim<sup>8</sup>, Ana Canadas-Sousa<sup>8</sup>, Patrícia Dias Pereira<sup>8</sup>, José Catarino<sup>9,10</sup>, Pedro Faísca<sup>9,10,11</sup>, Sandra Branco<sup>12</sup>, Cristiana Lopes<sup>13</sup>, Filipa Marcos<sup>13</sup>, Maria C. Peleteiro<sup>13</sup>, Hugo Pissarra<sup>13</sup>, Pedro Ruivo<sup>13</sup>, Rui Magalhães<sup>1</sup>, Milton Severo<sup>2,3</sup> and João Niza-Ribeiro<sup>1,2,3</sup>**

<sup>1</sup> Departamento de Estudo de Populações, Vet-OncoNet, ICBAS, Instituto de Ciências Biomédicas Abel Salazar, Universidade do Porto, Porto, Portugal.

<sup>2</sup> EPIUnit - Instituto de Saúde Pública, Universidade do Porto, Porto, Portugal

<sup>3</sup> Laboratório para a Investigação Integrativa e Translacional em Saúde Populacional (ITR), Porto, Portugal.

<sup>4</sup> Departamento de Ciências Veterinárias, Universidade Trás-os-Montes e Alto Douro (UTAD), Vila Real, Portugal.

<sup>5</sup> CECAV - Centro de Ciência Animal e Veterinária, Universidade de Trás-os-Montes e Alto Douro, Vila Real, Portugal

<sup>6</sup> Departamento de Clínicas Veterinárias, ICBAS, Instituto de Ciências Biomédicas de Abel Salazar, Universidade do Porto, Porto, Portugal.

<sup>7</sup> CECA-ICETA - Centro de Estudos de Ciência Animal, Instituto de Ciências, Tecnologias e Agroambiente, Universidade do Porto, Porto, Portugal.

<sup>8</sup> Departamento de Patologia e Imunologia Molecular, ICBAS, Instituto de Ciências Biomédicas Abel Salazar, Universidade do Porto, Porto, Portugal.

<sup>9</sup> DNAtch, Veterinary Laboratory, Lisboa, Portugal.

<sup>10</sup> Faculdade de Medicina Veterinária, Universidade Lusófona de Humanidades e Tecnologia, Lisboa, Portugal

<sup>11</sup> CBIOS- Research Center for Biosciences & Health Technologies, Universidade Lusófona de Humanidades e Tecnologia, Lisboa, Portugal.

<sup>12</sup> Instituto Mediterrâneo para a Agricultura, Ambiente e Desenvolvimento, MED, Universidade de Évora, Évora, Portugal

<sup>13</sup> VetPat, Veterinary Pathology Laboratory, Lisboa, Portugal.

\* Correspondence: kcpinello@icbas.up.pt

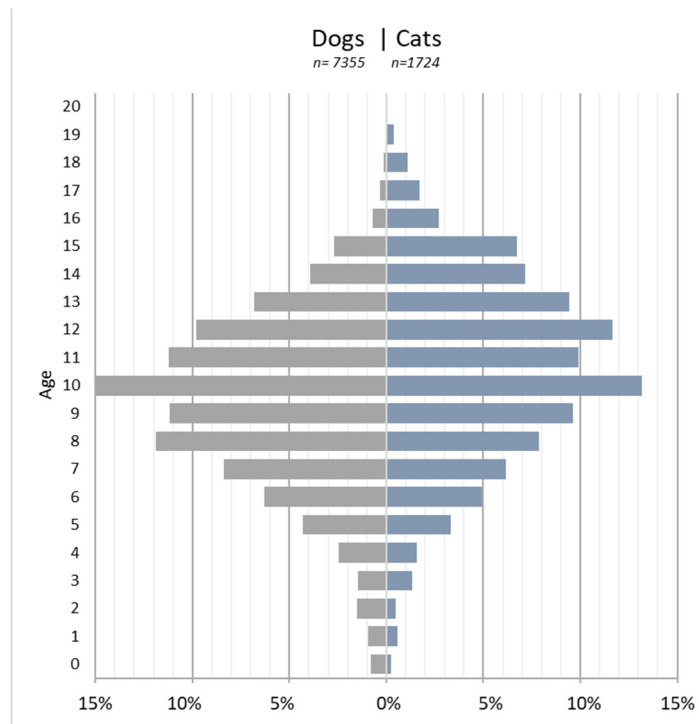

**Figure S1.** Age distribution by species.

**Table S1.** Age analysis of topography groups by specie and sex. Mean (SD).

|                         | Total      |            |             |             | Dog         |            |            | Cat        |              |
|-------------------------|------------|------------|-------------|-------------|-------------|------------|------------|------------|--------------|
|                         | total      | female     | male        | total       | female      | male       | total      | female     | male         |
| 1_Oral Cavity           | 9.5 (3.6)  | 9.6 (3.7)  | 9.3 (3.4)   | 9.2 (3.4)*  | 9.1 (3.5) f | 9.2 (3.3)  | 11.4 (3.9) | 12.3 (3.7) | 10.2 (3.9)#  |
| 2_Digestive             | 10.0 (3.2) | 10.0 (3.0) | 10.0 (3.3)  | 9.7 (3.1)   | 10.0 (2.9)  | 9.4 (3.2)  | 10.3 (3.2) | 10.1 (3.2) | 10.5 (3.3)   |
| 3_Respiratory           | 9.9 (4.0)  | 9.6 (4.0)  | 10.1 (4.0)  | 9.5 (3.4)   | 8.9 (3.0)   | 9.9 (3.7)  | 10.4 (4.7) | 10.3 (4.9) | 10.4 (4.6)   |
| 4_Spleen                | 10.1 (2.6) | 10.0 (2.5) | 10.2 (2.6)  | 10.2 (2.4)  | 10.0 (2.4)  | 10.4 (2.4) | 9.3 (4.2)  | 10.0 (3.6) | 6.0 (7.1)    |
| 5_Genito-Urinary Organs | 10.6 (2.8) | 10.3 (3.2) | 10.6 (2.6)  | 10.6 (2.8)  | 10.4 (3.3)  | 10.6 (2.6) | 10.7 (2.9) | 9.6 (2.7)  | 13.0 (1.7)#  |
| 6_Mammary Gland         | 10.0 (2.8) | 9.9 (2.8)  | 9.6 (3.5)   | 9.7 (2.6) * | 9.7 (2.6)   | 8.9 (3.4)  | 10.8 (3.0) | 10.8 (3.0) | 11.1 (3.3)   |
| 7_Eye                   | 9.2 (3.7)  | 8.2 (3.3)  | 10.4 (3.9)  | 9.6 (3.9)   | 7.7 (2.4)   | 11.3 (4.5) | 9.6 (3.6)  | 8.6 (4.0)  | 9.5 (3.2)    |
| 9_Endocrine             | 11.3 (2.5) | 11.6 (2.6) | 10.9 (2.3)  | 11.4 (2.4)  | 11.6 (2.6)  | 10.6 (1.5) | 11.2 (3.3) | 10.0 (0.0) | 11.5 (3.7)   |
| 10_Soft tissue          | 9.6 (3.0)  | 9.6 (2.8)  | 9.6 (3.0)   | 9.4 (2.8) * | 9.5 (2.8)   | 9.2 (2.7)  | 11.6 (3.8) | 10.0 (3.3) | 13.5 (3.7) # |
| 11_Lymph Nodes          | 9.4 (3.3)  | 10.2 (3.0) | 8.3 (3.2) & | 8.7 (3.2) * | 9.6 (3.0)   | 7.8 (3.3)# | 10.7 (3.0) | 11.2 (3.0) | 10.1 (2.7)   |
| 12_Bones                | 8.8 (3.6)  | 8.4 (4.1)  | 9.1 (3.2)   | 8.8 (3.5)   | 8.3 (4.0)   | 8.9 (3.4)  | 9.1 (3.7)  | 8.7 (4.6)  | 9.8 (2.5)    |
| 14_Skin                 | 9.1 (3.4)  | 9.0 (3.4)  | 9.0 (3.6)   | 8.9 (3.4) * | 8.9 (3.2)   | 8.8 (3.6)  | 10.3 (3.6) | 10.3 (3.5) | 10.3 (3.6)   |
| Total                   | 9.5 (3.2)  | 9.5 (3.0)  | 9.4 (3.5)   | 9.3 (3.2)   | 9.3 (3.0)   | 9.2 (3.4)  | 10.6 (3.4) | 10.6 (3.3) | 10.4 (3.6)   |

\* difference on the mean age between species (total dog versus total cat),  $p < 0.05$ . # difference on mean age between female versus male intraspecies,  $p < 0.05$ . & difference on mean age between sex (Total female versus Total cat),  $p < 0.05$ .

**Table S2.** Age analysis of the selected morphologies by specie and sex. Mean (SD).

|                                         | <b>Total</b> |               |             | <b>Dog</b>   |               |             | <b>Cat</b>   |               |             |
|-----------------------------------------|--------------|---------------|-------------|--------------|---------------|-------------|--------------|---------------|-------------|
|                                         | <b>total</b> | <b>female</b> | <b>male</b> | <b>total</b> | <b>female</b> | <b>male</b> | <b>total</b> | <b>female</b> | <b>male</b> |
| Mammary tumors                          | 10.0 (2.8)   | 10.0 (2.8)    | 10.6 (3.2)  | 9.7 (2.6) *  | 9.7 (2.6)     | 9.7 (3.4)   | 10.8 (3.0)   | 10.8 (3.0)    | 12.4 (2.2)  |
| Benigns                                 | 9.5 (2.6)    | 9.5 (2.6)     | 8.5 (1.7)   | 9.5 (2.6)    | 9.5 (2.5)     | 8.5 (1.7)   | 9.5 (2.7)    | 9.5 (2.7)     | -           |
| Maligns                                 | 10.4 (2.8)   | 10.4 (2.8)    | 11.5 (3.4)  | 9.9 (2.7) *  | 9.9 (2.7)     | 10.6 (4.3)  | 10.9 (3.0)   | 10.9 (3.0)    | 12.4 (2.2)  |
| Mast cell tumors                        | 8.4 (3.1)    | 8.3 (2.9)     | 8.5 (3.2)   | 8.3 (3.0)*   | 8.2 (2.9)     | 8.3 (3.1)   | 9.7 (3.7)    | 9.2 (3.6)     | 10.0 (3.7)  |
| Lipoma                                  | 9.5 (2.5)    | 9.5 (2.4)     | 9.5 (2.7)   | 9.4 (2.4)    | 9.4 (2.3)     | 9.4 (2.7)   | 10.3 (3.0)   | 10.4 (3.0)    | 10.2 (3.0)  |
| Hemangiomas                             | 9.2 (3.1)    | 8.6 (2.8)     | 9.8 (3.1)   | 9.0 (2.9)    | 8.5 (2.8)     | 9.5 (2.9)   | 15.0 (1.3)   | 15.0 (0.0)    | 15.0 (1.4)  |
| Hemangiosarcoma                         | 9.7 (2.7)    | 10.1(2.3)     | 9.4 (3.0)&  | 9.6 (2.7) *  | 9.9 (2.2)     | 9.2 (3.0)   | 11.2 (2.6)   | 11.0 (2.8)    | 11.7 (2.2)  |
| Cutaneous histio-<br>cytoma             | -            | -             | -           | 3.7 (2.9)    | 3.8 (2.9)     | 3.7 (2.9)   | -            | -             | -           |
| Histiocytic sarcoma                     | 8.2 (3.0)    | 8.2 (3.1)     | 8.3 (2.9)   | 7.9 (2.8)    | 7.6 (2.9)     | 9.7 (0.6)   | 9.1 (3.5)    | 10.0 (3.0)    | 4.0 (0)     |
| Melanomas and mela-<br>nocyctomas       | 9.8 (2.9)    | 9.5 (3.0)     | 10.0 (2.8)  | 9.9 (2.8)*   | 9.8 (2.9)     | 10.1 (2.7)  | 7.2 (3.2)    | 6.5 (2.9)     | 8.3 (3.5)   |
| Canine perivascular<br>cell wall tumors | -            | -             | -           | 10.1 (2.7)   | 10.1 (2.8)    | 10.1 (2.6)  | -            | -             | -           |
| Squamous cell carci-<br>noma            | 10.3 (3.1)   | 10.4 (3.3)    | 10.3 (3.0)  | 10.2 (2.9)   | 10.4 (2.8)    | 10.0 (2.9)  | 10.5 (3.4)   | 10.6 (3.7)    | 10.4 (3.0)  |
| Lymphomas                               | 9.6 (3.4)    | 9.8 (3.3)     | 9.4 (3.4)   | 9.2 (3.2)*   | 9.8 (3.1)     | 8.5 (3.2)#  | 10.0 (3.4)   | 9.8 (3.6)     | 10.2 (3.3)  |
| Fibrosarcoma                            | 11.1 (3.4)   | 10.4 (2.3)    | 11.6 (4.0)  | 10.2 (2.3)*  | 9.8 (1.6)     | 10.8 (2.9)  | 11.5 (3.8)   | 10.9 (2.6)    | 11.9 (4.4)  |
| Osteosarcomas                           | 9.0 (3.3)    | 9.1 (3.0)     | 8.8 (3.6)   | 9.1 (3.3)    | 9.5 (2.9)     | 8.8 (3.7)   | 8.1 (3.2)    | 7.2 (3.4)     | 9.3 (3.0)   |

\* difference on the mean age between species (total dog versus total cat),  $p<0.05$ . # difference on mean age between female versus male intraspecie,  $p<0.05$ . & difference on mean age between sex (total female versus total male),  $p<0.05$ .
